# Supplementary material
Source: PubMed Central journal article supplement (PMC5378162)
Supplement: NIHMS852213-supplement-supplement_1.pdf [file NIHMS852213-supplement-supplement_1.pdf]

**Supplementary Box 1:** Description of the mission and objectives of each translational science organization.

**CDRD:** The Centre for Drug Research and Development is Canada's fully-integrated national drug development and commercialization center, providing expertise and infrastructure to enable researchers from leading health research institutions to advance promising early-stage drug candidates. Its mandate is to de-risk discoveries stemming from publicly-funded health research and transform them into viable investment opportunities for the private sector — thus successfully bridging the commercialization gap between academia and industry, and translating research discoveries into new therapies for patients. [www.cdrd.ca](http://www.cdrd.ca)

**EATRIS ERIC:** The European Infrastructure for Translational Medicine is comprised of over 70 leading academic groups and institutions in ten countries, which provide access to innovative translational research infrastructure and expertise for companies and researchers in need of support for advancing biomedical innovations. They leverage their state-of-the-art facilities and knowledge to reduce risks within translational research across Europe, while increasing productivity, by providing a single point of access to the best expertise and to large and diverse clinical patient cohorts. [www.eatris.eu](http://www.eatris.eu)

**MRCT:** MRC Technology is a medical research charity that progresses promising research into patient treatments and diagnostics. Being self-funded, it works with academic, pharmaceutical, biotechnology and charity organizations to identify, protect and develop translatable medical science research with the potential to benefit patients. Expertise from MRCT's Centre for Therapeutics Discovery and Centre for Diagnostics Development, combined with IP and commercialization acumen, ensure innovative science reaches its full potential. The charity has further established the Dementia Consortium and Neurodegeneration Medicines Acceleration Programme to evolve promising science from parked pharma projects. [www.mrcttechnology.org](http://www.mrcttechnology.org)

**NCATS:** The National Center for Advancing Translational Sciences at the US National Institutes of Health (NIH) was established to transform the translational science process so that new treatments and cures for disease can be delivered to patients faster. NCATS strives to develop innovations to reduce, remove or bypass costly and time-consuming bottlenecks in the translational research pipeline in an effort to speed the delivery of new drugs, diagnostics and medical devices to patients. The Center emphasizes innovation and deliverables, relying on the power of data and new technologies to develop, demonstrate and disseminate improvements in translational science. [www.ncats.nih.gov](http://www.ncats.nih.gov)

**TIA:** Therapeutic Innovation is a not-for-profit organization charged with creating an integrated translational health research infrastructure in Australia that will accelerate translation of research discoveries and improve translational efficiency. TIA offers a suite of capabilities enabling development of novel health technologies from the laboratory bench into clinical trials via a collaborative network of 45 academic and medical research centers around the nation. TIA is the lead agent implementing the Australian Government's initiatives in Translating Health Discovery and Translating Health and Medical Research. Activities and funding under these projects support translational health researchers by providing access to both state of the art facilities and world class commercialization expertise. [www.therapeuticinnovation.com.au](http://www.therapeuticinnovation.com.au)
